# Supplementary material for: Tumor Activated Cell Penetrating Peptides to Selectively Deliver Immune Modulatory Drugs
Source: PubMed Central journal article supplement (PMC8000974; doi:10.3390/pharmaceutics13030365), 2021-03-10
Supplement: pharmaceutics-13-00365-s001.pdf [file pharmaceutics-13-00365-s001.pdf]

# Supplementary Materials: Tumor Activated Cell Penetrating Peptides to Selectively Deliver Immune Modulatory Drugs

Dina V Hingorani, Maria F Camargo, Maryam A Quraishi, Stephen R Adams and Sunil J Advani \*

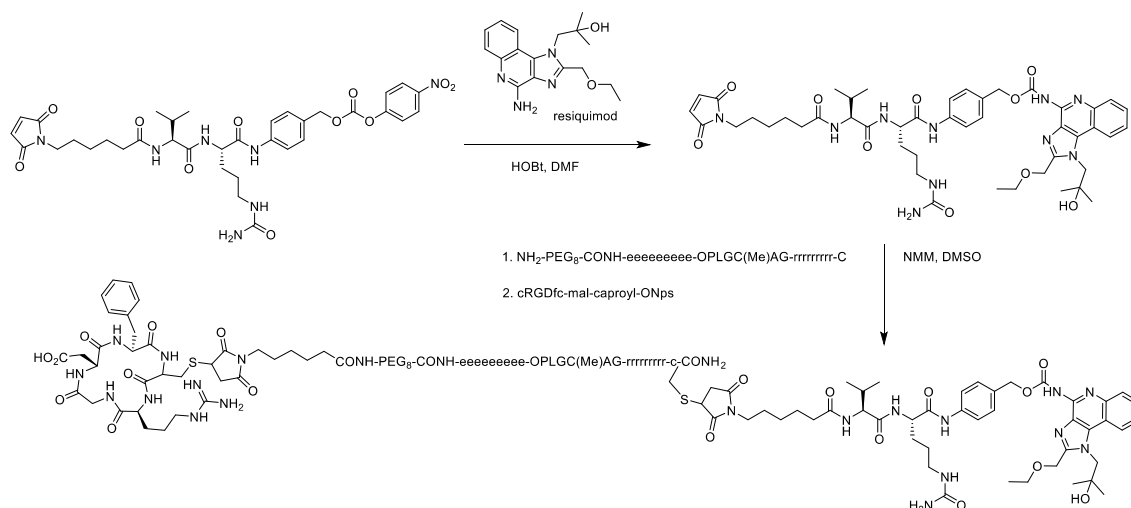

**Figure S1.** Synthesis scheme for cRGD-ACPP-resiquimod.

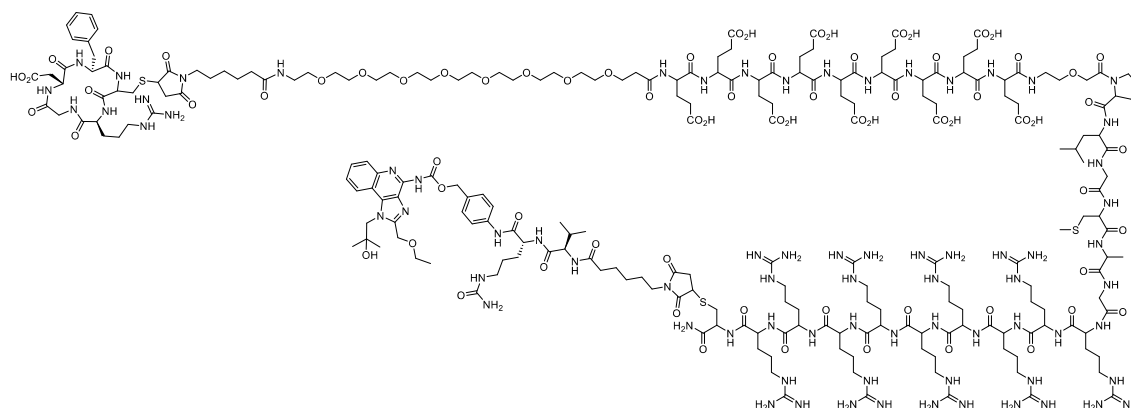

**Figure S2.** Chemical structure of cRGD-ACPP-resiquimod.

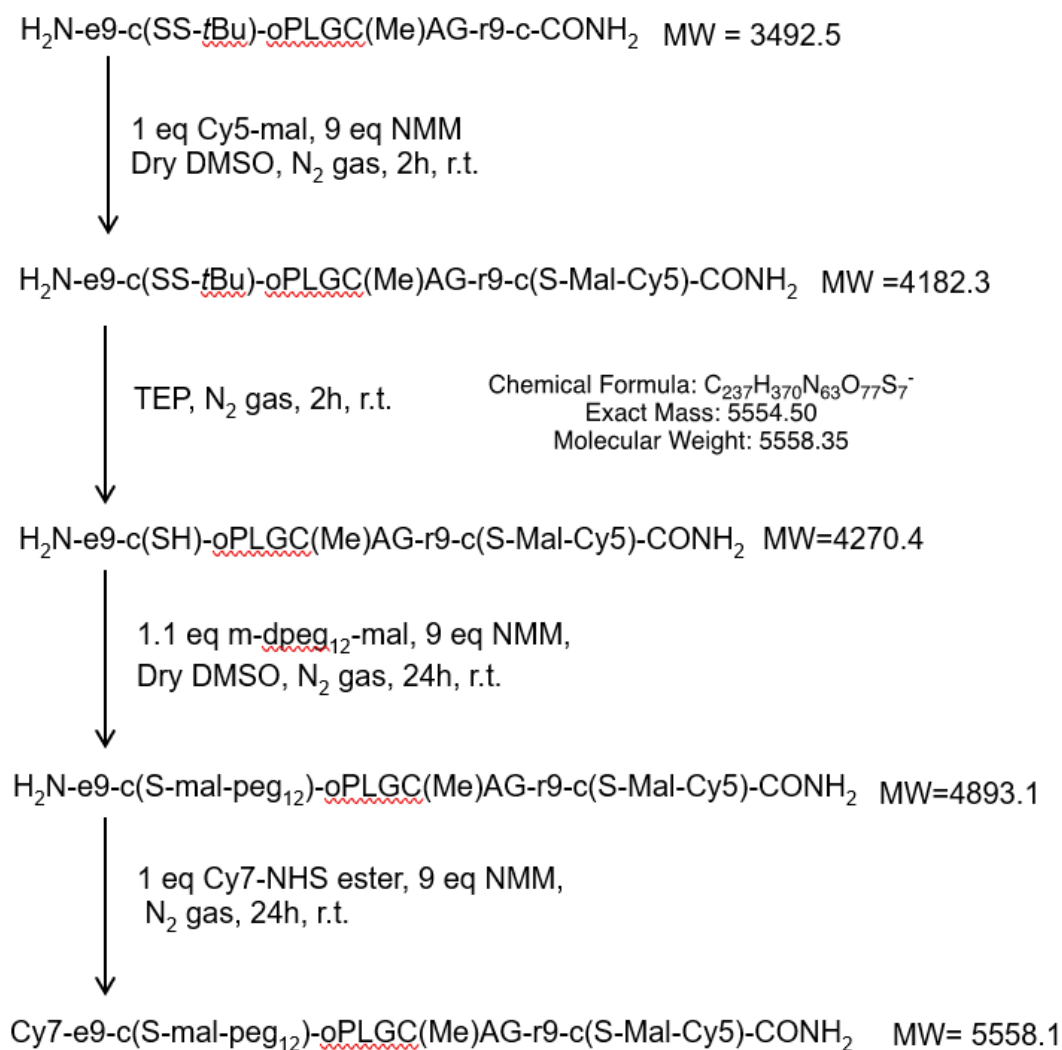

Figure S3. Synthesis scheme for ratiometric ACPP.

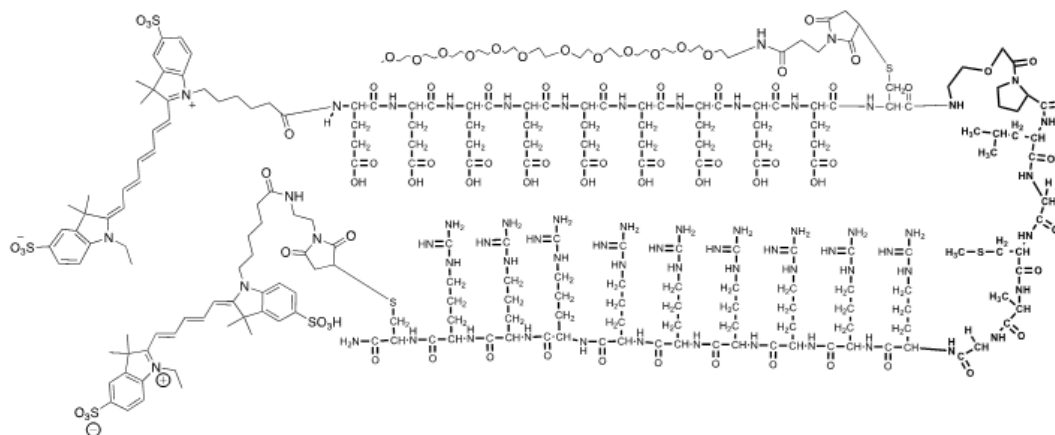

Figure S4. Chemical structure of ratiometric ACPP.

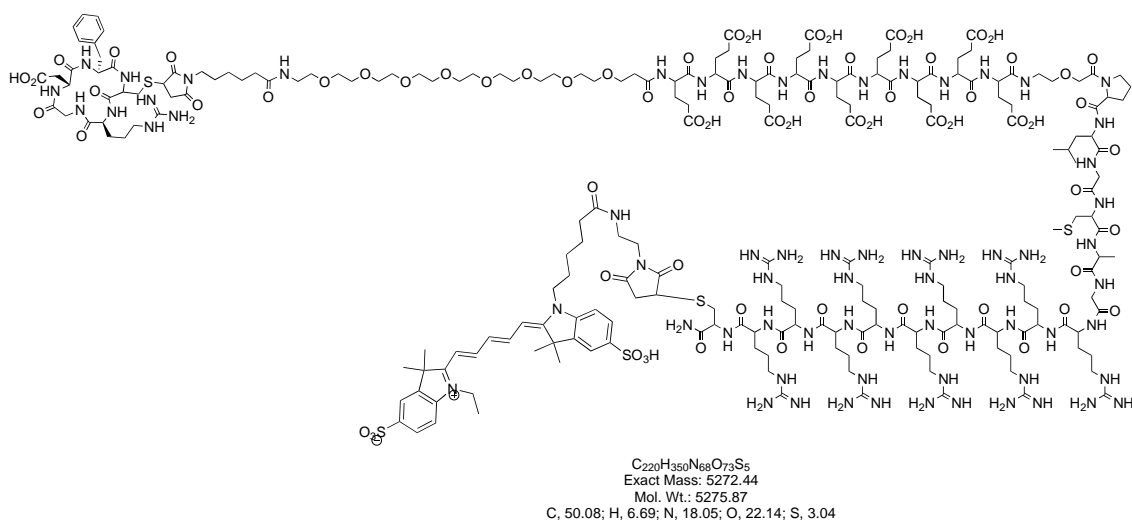

**Figure S5.** Chemical structure of ACPP-Cy5 conjugate.

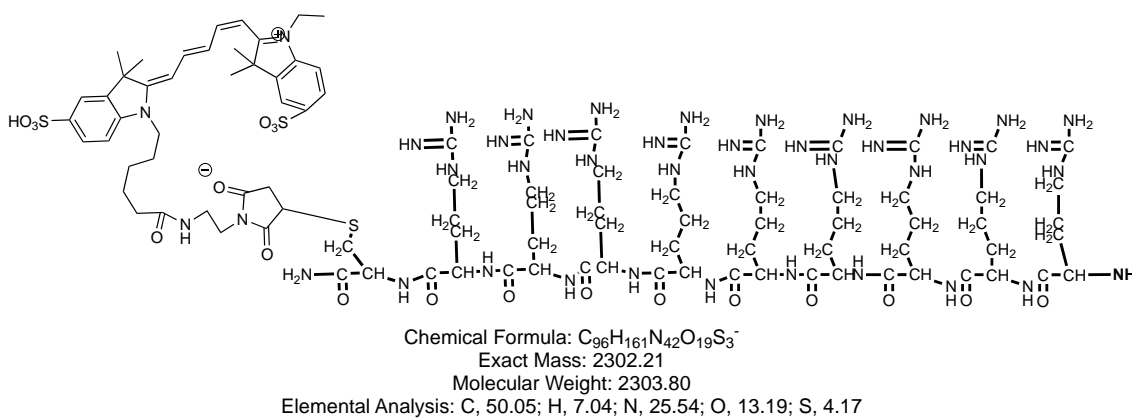

**Figure S6.** Chemical structure of CPP-Cy5.

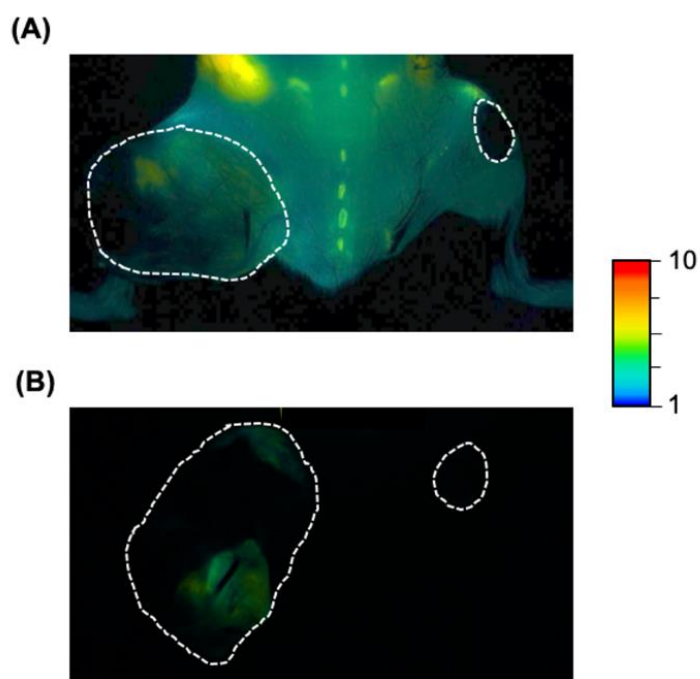

**Figure 7.** ACPPs in situ cleavage within murine tumors. **(A)** Mice with subcutaneous syngeneic B16F10 murine melanoma tumors tail vein injected with 10 nanomoles ratiometric ACPP. In situ mouse imaging for Cy5: Cy7 emission ratio shown. Cy5: Cy7 emission ratio **(B)** Ex-vivo tumor tissue excised from animal and imaged for Cy5: Cy7 emission ratio. Pseudocolor scale bar shown on far right for both images.
